1                    **Effect of electrical hybrid-frequency waterbath stunning on the spontaneous**  
2                    **electroencephalogram (EEG) and electrocardiogram (ECG) of broilers**

3

4    La Vega, L.T<sup>1</sup>.; Sato, D<sup>2</sup>.; Piza, L. V<sup>2</sup>.; Costa, E. J. X<sup>2\*</sup>

5    <sup>1</sup> F&S Animal Origin Food Consulting, São Paulo – SP, Postal Code 04532-060

6    <sup>2</sup> Laboratory of Applied and Computational Physics, ZAB, FZEA, University of São Paulo –

7    Pirassununga/SP, Postal Code 13635-900 – e-mail: [ernane@usp.br](mailto:ernane@usp.br)

8

9

**ABSTRACT**

10

11    Concerns about animal welfare and meat quality have encouraged research on new methods for  
12    the stunning of broilers during animal slaughter. In this study, the electroencephalogram (EEG)  
13    and electrocardiogram (ECG) of broilers were acquired during stunning using an electrical  
14    hybrid instead of a single frequency. Considering a square-wave with a current of 220 mA and  
15    a frequency of 1100 Hz (duty-cycle 50%), the hybrid-frequency waveform is obtained  
16    generating pulses at 6600 Hertz in the pulse-width phase. Sixty broilers aged 42 days were  
17    randomly sampled; thirty were used for EEG measurement and thirty for ECG measurement.  
18    For EEG measurements, the birds' scalps were anaesthetized, and EEG electrode needles were  
19    inserted on the subcutaneous part of the occipital scalp. For ECG, the non-invasive surface  
20    electrode was used. The electrodes were connected to a digital EEG/ECG system. The results  
21    showed that the hybrid-frequency waveform system generated epileptic forms in the birds'  
22    EEGs. Therefore, a hybrid-frequency system may present better carcass quality results, while  
23    preserving the birds' welfare, when compared with a single frequency system use.

24

25    **Keywords** *poultry, unconsciousness, electrical stunning, animal welfare*

26 **INTRODUCTION**

27

28           Electrical stunning is the most common method for poultry stunning prior to slaughter,  
29 but it has been questioned on animal welfare and product quality grounds. The procedure  
30 consists of passing an electric current through the birds' brains with a magnitude sufficient to  
31 cause uncontrolled hyperpolarization of the neurons leading to unconsciousness (Berg and Raj,  
32 2015). Animal welfare at the time of slaughter is under Regulation 1099/2009 of the European  
33 Union (European Union Council, 2009), and the regulation permits the use of different  
34 electrical stunning systems with electrical parameters that have been scientifically  
35 demonstrated. According to the regulation, water bath stunning shall be carried out for at  
36 duration of at least four seconds and with the minimum currents shown in Table 1. The World  
37 Organization for Animal Health (OIE) in its Terrestrial Animal Health Code (OIE 2019), has  
38 also recommended these electrical parameters.

39 **Table 1 — Electrical requirements for water bath stunning equipment**

| Frequency           | Chickens | Turkeys | Ducks and geese | Quail         |
|---------------------|----------|---------|-----------------|---------------|
| <200                | 100 mA   | 250mA   | 130mA           | 45mA          |
| From 200 to 400 Hz  | 150 mA   | 400mA   | Not permitted   | Not permitted |
| From 400 to 1500 Hz | 200 mA   | 400mA   | Not permitted   | Not permitted |

40

41           The electrical stunning equipment used to meet the aforementioned recommendations  
42 has a generator circuit that provides different waveforms, frequencies, and amplitudes of  
43 electrical currents. The equipment must have an automatic compensation circuit according to a  
44 bird's impedance variations in the slaughter line in order to deliver a constant current to each  
45 bird. However, because the high speed of lines, this compensation cannot be performed very  
46 accurately (Berg and Raj, 2015).

47           Considering the guidelines of the European Union and OIE, along with the  
48 internationally designed requirements for humane slaughter, the objective of this study was to  
49 investigate electroencephalogram (EEG) and electrocardiogram (ECG) patterns of broilers  
50 stunned with hybrid electrical current frequencies, instead of single frequencies, to evaluate  
51 their impact on animal welfare. The experiment was conducted in the COPACOL  
52 slaughterhouse company, located in city of Cafelândia, in the state of Paraná, Brazil. The study  
53 was approved by the Ethics Committee on Animal Use (CEUA / USP-FZEA) under Protocol  
54 CEUA n° 4042150818. The authors declare no conflict of interest.

55

## 56 **MATERIAL AND METHODS**

57

58           For ECG and EEG, a total of 60 broilers, ROSS line males with an average weight of  
59 2.96 kg (std = 0.02) at 42 days-old, were used. Thirty broilers were used for EEG evaluation  
60 and 30 for ECG evaluation. Broilers were taken directly from the production line and brought  
61 to the experimental location created in the poultry sector of the COPACOL Company.

62           The electrical stunning equipment used, model UFX 7 (provided by Fluxo<sup>®</sup> Industrial  
63 Electronics - SC / Brazil), has selection waveforms for direct or alternating electric currents  
64 (DC/AC), a variable frequency of 20-3000 Hz, duty cycle regulation from 10 to 90%, an output  
65 voltage of 10-350 VRMS (Root Mean Square Voltage), and a couple of hybrid-frequency  
66 options. The electric current amplitude was registered with a True RMS digital multimeter  
67 model U1252B (Keysight Technologies<sup>®</sup> - USA), and the waveforms were monitored with a  
68 portable oscilloscope model H110-037 (HOMIS<sup>®</sup> - Brazil).

69

70 *Hybrid frequency waveform system*

71            Considering a square wave DC current with an amplitude of 220 mA  $\pm$  10 mA and a  
72 frequency of 1100 Hz (duty cycle 50%), the hybrid frequency waveform was created by the  
73 application of pulses of 6600 Hz in half of each cycle, in the pulse width time. Figure 1 depicts  
74 a graphical representation of hybrid waveform used in this study.

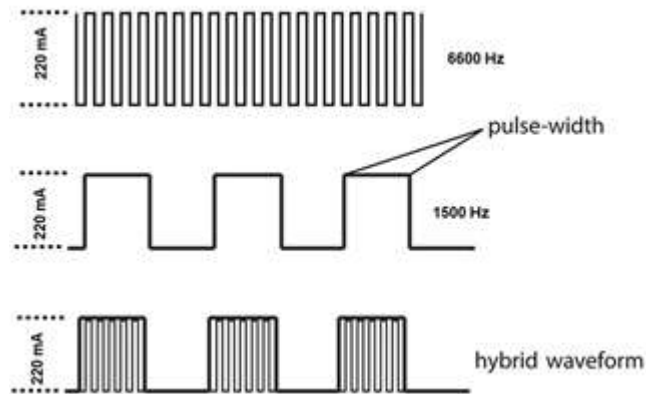

75

76            Figure 1 – Graphical representation of hybrid frequency waveform used in the study

77

78            For ECG measurements, broilers were fitted with commercially available (2223BRQ  
79 3M<sup>®</sup> model), self-adhesive ECG electrodes, which were adhered to cleaned skin overlying the  
80 pectoralis muscles on either side of the sternum, with a ground electrode under the right leg  
81 (Figure 2).

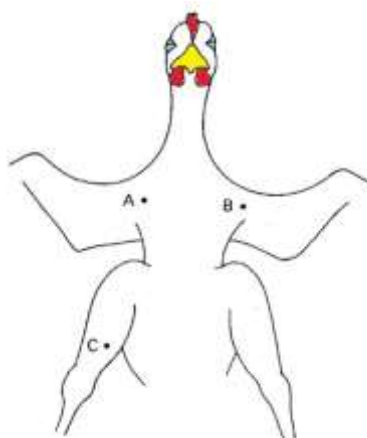

82

83            Figure 2 – Diagram of electrode placement on the broilers

84

85 For the EEG measurements, the birds were individually implanted with needle  
86 electrodes (55% silver, 21% copper, 24% zinc of 10 mm x 1.5 mm diameter – Neurosoft® mod.  
87 NS-NE-P-250/13/04) positioned under the skullcap, through the skin and skull onto the brain  
88 lobes (0.3 cm left and right of the sagittal suture and 0.5 mm toward an imaginary transverse  
89 line at the caudal margin of the eyes), with one reference electrode placed on the right or left  
90 leg. The birds were anesthetized with lidocaine (0.5 ml) applied subcutaneously on the same  
91 electrode areas, by using 31 gauge BD syringes (BD Ultra-Fine™). The electrodes were  
92 connected to the broilers with press-stud electrical connections.

93 To assess the EEG and ECG signals, each broiler was wrapped with a containment  
94 constructed Lycra harness, which was fastened using Velcro. The harness had a pocket to hold  
95 the wires from the electrodes and the EEG or ECG readers. The wrapped birds were placed on  
96 the slaughter line shackling and underwent the normal stunning process. The electrical water  
97 bath had the capacity for 12 birds at a time. As soon as the bird left the electrical water bath,  
98 the equipment (ECG/EEG) was automatically turned on, and the bird was taken off the line and  
99 hung on an auxiliary shackling line. The EEG/ECG signals were acquired for 60 seconds before  
100 and 60 seconds after the stunning process using wireless technology.

101 The EEG and ECG were collected at a sample frequency of 120 Hz and 200 Hz,  
102 respectively; the digital signal obtained was processed using fast Fourier transform (FFT),  
103 implemented using the MATLAB tool in order to obtain the frequency spectrum of different  
104 stretches associated with different events on the EEG (De Sousa Silva *et al.* 2005). Several  
105 successive artifact-free stretches were also analyzed and filtered using elliptical filters  
106 integrated into a visual tool developed at MATLAB®.

107

108

109

110 **RESULTS & DISCUSSION**

111 The most important electrical parameters in electrical stunning are the current, voltage,  
112 frequency, and resistance. The electrical current, measured in amperes (A), is defined as the  
113 amount of electric charge flowing through a conductor. In electric circuits, this charge is carried  
114 by electrons and ions in an electrolyte. The electric potential difference, known as voltage, is  
115 the difference of electrical charge between two points, measured in volts (V). The electrical  
116 impedance is the measure of the difficulty of an electric current to flow through a conductor,  
117 and it is measured in ohms ( $\Omega$ ). In living tissues, a better term to define impedance is bio  
118 impedance (Grimnes and Martinsen, 2015). These three electrical parameters are closely related  
119 through Ohm's law (Eq.1):

120 
$$I=V/Z = \frac{V}{|Z|e^{-i\arg(z)}} \quad (1)$$

121 The tissue impedance can be modeled by using Equation 2 (Seoane *et al.*, 2004).

122 
$$z = Re \left\{ \frac{(1-f)Re+(2+f)\left(Ri-\frac{i}{\omega CmRa}\right)}{(1+2f)Re+2(1-f)\left(Ri-\frac{i}{\omega CmRa}\right)} \right\} \quad (2)$$

123 where:

124 Z= impedance of tissue seo

125 Re = resistivity of extracellular fluid ( $\Omega\text{cm}$ )

126 Ri = resistivity of cytoplasm ( $\Omega\text{cm}$ )

127 Cm = surface membrane capacity (Farads/cm<sup>2</sup>)

128 Ra = cell radius (cm)

129 F = volume factor of cell concentration

130  $\omega$  = angular frequency (rads/s)

131 i = the imaginary unity (root square of -1)

132

133 A great variation in electrical parameters has been used in electric stunning studies  
 134 (Table 2). Even when the same frequency is used, for example, there are differences between  
 135 voltages and waveforms, as well as amplitudes of the electric current and times of shock  
 136 application. This fact may make direct result comparison challenging.

137 According to Table 2, the parameters used in this study (220 mA ± 10 mA, 1100 Hz  
 138 (Duty Cycle 50%)) to carry out the experiments have been applied previously in other studies.

139 Table 2 – Different waveforms, stun-time and current/voltage levels applied in electrical  
 140 stunning studies

| Study                        | Voltage (V)      | Waveform                                              | Current (mA)   | Frequency (Hz)          | Time (s) |
|------------------------------|------------------|-------------------------------------------------------|----------------|-------------------------|----------|
| (Gregory and Wotton 1991)    | NP               | DC pulsed unipolar                                    | 71 - 206       | 350                     | 4        |
| (Craig and Fletcher 1997)    | NP<br>11         | AC<br>DC pulsed                                       | 125<br>NP      | 50<br>500               | 5<br>10  |
| (Wilkins <i>et al.</i> 1998) | 87-117<br>90-157 | DC pulsed, rectified sinewave<br>AC sinewave, clipped | 104-111<br>105 | 100, 500,<br>1500<br>50 | 4        |
| (Raj and O'Callaghan 2004a)  | Pico 620         | AC sinewave                                           | 100,<br>150    | 50, 400, 1500           | 1        |
| (Xu <i>et al.</i> 2011)      | 35, 50, 65       | AC sinewave                                           | 47, 67,<br>86  | 160, 400,<br>1000       | 15       |
| (Prinz <i>et al.</i> 2012)   | 60<br>80<br>120  | AC sinewave<br>AC rectangular<br>DC pulsed            | 50<br>70<br>70 | 50<br>90<br>130         | 4        |

141 NP – not provided; AC – alternative current; DC – direct current

142

143

144

145

146 *EEG response in electrically stunned chickens*

147 Digital processing of the EEG data reveal that 100% of the birds, at the exit of the  
148 electrical water bath, had an epileptic form followed by a quiescent pattern. This pattern lasted  
149 until the moment of bleeding, presenting no EEG pattern compatible with return of  
150 consciousness; i.e., after bleeding the EEG evolved to an isoelectric pattern. In addition, the  
151 data show that no bird had brain death before cutting.

152 Figure 3 shows representative brain electrical activity before and after the stunning  
153 process of one of the birds, randomly selected. The same phenomenon occurred in all birds  
154 sampled.

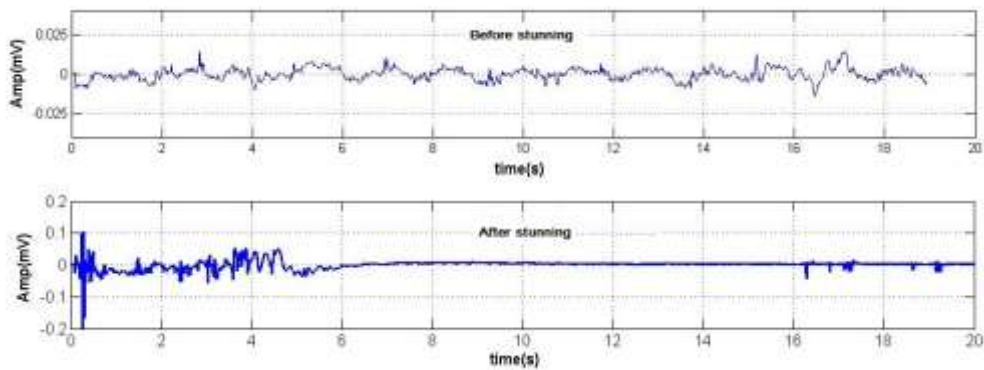

155

156 Figure 3 - EEG pattern before and after Stunning process

157 For all acquired EEG signals, the signal Power Spectral Density (PSD) was calculated  
158 using the Welch Method (Manshouri *et al.*, 2018). PSD displays the power distribution among  
159 the frequency components. Epileptic events have a different frequency distribution than normal  
160 brain signals, characterized mainly by an increase in frequency. Figure 4 shows the PDS  
161 calculated for EEG before and after stunning for a 95% confidence interval.



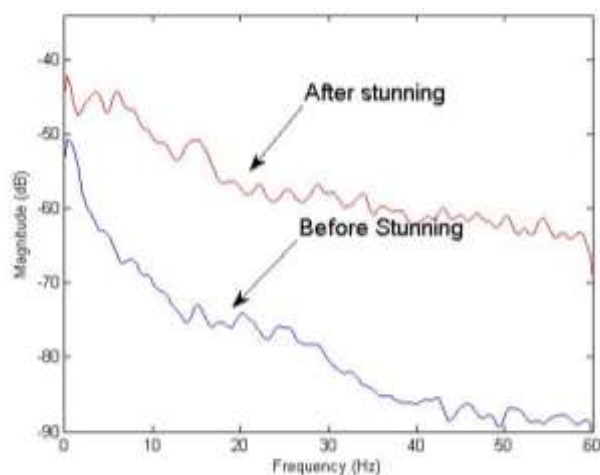

162

163 Figure 4– EEG Power Spectral Density (PSD) estimated using the Welch Method

164 In the brain, the electric current created by the shooting of the neurons is dissipated  
165 throughout the brain tissue, reaching the surface of the scalp, and can be captured and evaluated.  
166 The graphic record of the variation in the amplitude of the electrical brain activity based on  
167 time is an EEG.

168 The electric brain signals show features that distinguish them from other biological  
169 signs, such as those coming from the heart. According to the European Food Safety Authority  
170 (EFSA), efficient stunning methods disrupt the neurons or neurotransmitter regulatory  
171 mechanisms in the brain, causing a long-lasting depolarized neuronal state that renders animals  
172 unconscious and insensible (EFSA 2004). The EEG is the most reliable indicator of the  
173 unconsciousness and insensibility of the birds, since somatosensory reflexes and direct  
174 observations are not sufficiently reliable indicators of insensibility at high frequencies (EFSA  
175 2013).

176 The use of signal processing techniques represent an important tool for identifying  
177 patterns on the EEG. The employment of digital processing methods for signals allows for more  
178 information to be obtained from the EEG signals than is obtained in its representation in the  
179 form of a time series. These processing methods include Fourier analysis, time-frequency, non-  
180 linear models, as well as the theory of complex systems and wavelets (Marchant, 2003). As

181 seen in Figure 4, when the data are transformed, the frequencies and their magnitudes are more  
182 prominent, and the differences between before and after stunning can be better quantified.

183

#### 184 *ECG response in electrically stunned chickens*

185 The ECG measurement is an important physiological measurement to analyze broilers'  
186 behavior (Blanchard *et al.*, 2002). Actually, ECG had been used mainly to monitor broilers  
187 under Low Atmospheric Pressure Stunning (LAPS) methods (Martin *et al.*, 2016), and few  
188 studies have been conducted on electrical water bath stunning methods. Notwithstanding, ECG  
189 can be used to monitor the broilers' heart rates before and after electrical stunning (Barbosa *et*  
190 *al.*, 2016).

191 After the ECG data were digitally processed, it was revealed that 100% of the birds  
192 were alive until bleeding. The ECG allowed the correct measuring frequencies of the birds'  
193 heartbeats before and after the passage of the stunning electric current (Figure 5). Figure 5  
194 shows the electrical activity of the heart, before and after the stunning process, of one of the  
195 birds randomly selected from the experimental runs.

196

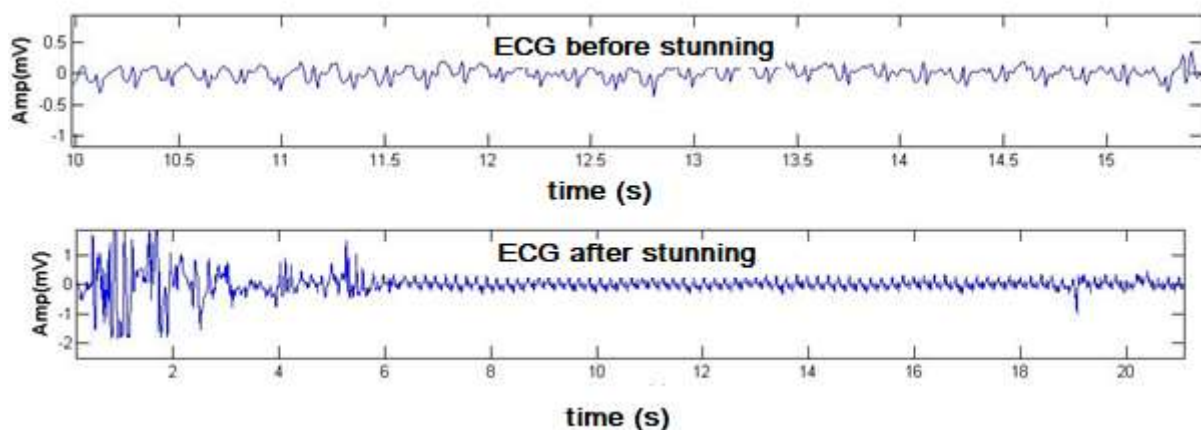

197

198 Figure 5 – ECG signals sampled before and after the stunning process

199

200           The signals shown in Figure 5 were collected from the time the bird left the electrical  
201 water bath, i.e. just after the stunning process, and continued until after bleeding. The ECG  
202 pattern shows that, after the passage of the electric current, the heart rate, although altered in  
203 relation to frequency and amplitude, continued to represent an electrically active heart until the  
204 cut performed by the bleeder.

205           As suggested by other studies (Raj and O’Callaghan, 2004a; Raj *et al.*, 2006a), the  
206 depth of desensitization can be related to the pulse width time. In this case, the use of a hybrid-  
207 frequency electrical current, respecting the proportion of the single wave duty-cycle, may have  
208 contributed to obtaining increased levels of current. In living tissue, there are free ions in  
209 extracellular fluids, where the electrical current finds less resistance to flow. The lipid and  
210 protein components of living tissues offer more resistance to the passage of electrical currents,  
211 and different parameter configurations of an electrical current could change their conductivity.  
212 For example, the increase of electric current frequency has been shown to raise the conductivity  
213 of living tissues (Gabriel, 1996).

214           Since the use of high frequencies has the potential to improve the quality of meat, as  
215 verified by various studies (Gregory and Wotton, 1991; Wilkins *et al.*, 1998; Xu *et al.*, 2011;  
216 Huang *et al.*, 2014), the use of a hybrid frequency wave system results in a positive effect on  
217 meat quality, without negatively affecting the animal’s welfare. However, concerning animal  
218 welfare, a very important question is whether loss of consciousness occurs instantly in electrical  
219 stunning.

220           The occurrence of highly synchronized 8–13 Hz activity in EEG recordings, as well  
221 as the absence of potential somatosensory evoked responses are known as reliable  
222 measurements to determine the effectiveness of stunning methods (Berg and Raj, 2015;  
223 Terlouw *et al.*, 2015). In a study using different electrical single stunning frequencies,  
224 generalized epilepsy activity in an EEG of a broiler’s brain one second after electrical shock

225 (Raj and O’Callaghan, 2004a) was observed. Despite some initial disagreement regarding the  
226 occurrence of generalized epilepsy in poultry (Gregory and Wotton, 1987; Gregory and Wotton,  
227 1989; Raj, 2003), further research confirmed that effective electrical stunning of chickens  
228 indeed leads to epileptiform EEG activity compatible with an unconscious state (Raj and  
229 O’Callaghan, 2004b; Raj *et al.*, 2006a; Raj *et al.*, 2006b).

230 To the best of the authors’ knowledge, there is no information on the brain activity of  
231 broilers at the exact moment of electrical shock. The published studies report brain activity right  
232 after the electrical shock. The scientific knowledge about human electroconvulsive therapy  
233 without the use of anaesthetics, which includes reports of intensive pain by patients, was used  
234 in a critical comparison to the electrical stunning of broilers (Zivotofsky and Strous, 2012).  
235 Unfortunately, even in methods where animals recover after the procedure, an animal cannot  
236 express whether it had experienced pain during the electrical shock, and there is no technology  
237 available to date to answer this question.

238 Regarding obtaining an unconsciousness state, several studies have shown that low  
239 frequencies (50/60 Hz) are more effective, and when high frequencies are used, the amount of  
240 electrical current must be increased to maintain the effectiveness of stunning (Gregory and  
241 Wotton, 1991; Wilkins *et al.*, 1998; Raj *et al.*, 2006a; Prinz *et al.*, 2010a; Prinz *et al.*, 2010b;  
242 Prinz *et al.*, 2012). Regarding meat quality, higher frequencies have shown a positive effect  
243 with a decrease of broken bones and hemorrhagic spot indices in many species (Anil and  
244 McKinstry, 1992; Turcsán *et al.*, 2003; Xu *et al.*, 2011; Grimsbø *et al.*, 2014; Robins *et al.*,  
245 2014; Huang *et al.*, 2014).

246

247

248

249

250 **CONCLUSIONS AND APPLICATIONS**

251 The results of the experiments conducted at slaughterhouse of Copacol (Cafelândia -  
252 PR) with the hybrid-frequency wave current generator, using the stunning equipment UFX7  
253 Solution® support the following conclusions:

254 • Humanitarian slaughter: 100% of the birds that underwent electrical shock presented  
255 generalized epilepsy after being submitted to the pre-established electrical standards of the  
256 European Union and OIE. This conclusion is supported by clinical analysis and EEG data  
257 analysis.

258 • Religious slaughter - Halal: 100% of the birds were still alive after the electric shock  
259 according to the EEG and ECG data, as well as clinical signs. There was no impact on the  
260 killing or bloodletting process. The use of hybrid-frequency current is effective to promote  
261 humanitarian and Halal slaughter, guaranteeing epilepsy followed by a quiescence period, and  
262 keeping animals alive after desensitization. In addition, equipment with an effective  
263 combination of hybrid waves allows for adjustments, not only of the amplitude and frequency  
264 of the waves, but also to the waveform, duty cycle, and complex wave compositions. This  
265 flexibility benefits the animals, which suffer no pain, and the slaughter, which incurs greater  
266 productivity. The results of the research show that EEG and ECG data can be used to support  
267 the requirements of humanitarian and Halal slaughter, respectively.

268 ***Acknowledgment***

269 The authors would like to thanks to Prof.. JaciMara Baptista and Ms. Madariaga-Hopkins  
270 from UNLV-USA for English revision.

271

272

273

274

275 **REFERENCES**

- 276 Anil MH, McKinstry JL (1992) The effectiveness of high frequency electrical stunning  
277 in pigs. *Meat Science* **31**, 481–491. doi:10.1016/0309-1740(92)90030-8.  
278
- 279 Berg C, Raj M (2015) A Review of Different Stunning Methods for Poultry — Animal  
280 Welfare Aspects (Stunning Methods for Poultry). *Animals* **5**, 1207–1219.  
281 doi:10.3390/ani5040407.  
282
- 283 Blanchard S, Degernes L, DeWolf D, Garlich J (2002) Intermittent biotelemetric  
284 monitoring of electrocardiograms and temperature in male broilers at risk for  
285 sudden death syndrome. *Poultry Science* **81**, 887–891. doi:10.1093/ps/81.6.887.  
286
- 287 Craig E, Fletcher D (1997) A comparison of high current and low voltage electrical  
288 stunning systems on broiler breast rigor development and meat quality. *Poultry*  
289 *Science* **76**, 1178–1181. doi:10.1093/ps/76.8.1178.  
290
- 291 EFSA (2004) Opinion of the Scientific Panel on Animal Health and Welfare (AHAW)  
292 on a request from the Commission related to welfare aspects of the main  
293 systems of stunning and killing the main commercial species of animals. *EFSA*  
294 *Journal* **2**, 45. doi:10.2903/j.efsa.2004.45.  
295
- 296 EFSA (2013) Annual Report of the EFSA Journal 2012. *EFSA Supporting*  
297 *Publications* **10**,. doi:10.2903/sp.efsa.2013.EN-418.  
298
- 299 European Union Council (2009) ‘Regulamento (CE) N. o 1099/2009 do Conselho da  
300 União Européia de 24 de Setembro de 2009 relativo à proteção dos animais no  
301 momento da occisão.’  
302
- 303 Gabriel SG and RWL and C (1996) The dielectric properties of biological tissues: II.  
304 Measurements in the frequency range 10 Hz to 20 GHz. *Physics in Medicine*  
305 *and Biology* **41**, 2251.  
306
- 307 Gregory NG, Wotton SB (1987) Effect of electrical stunning on the  
308 electroencephalogram in chickens. *The British veterinary journal* **143**, 175–183.  
309 doi:10.1016/0007-1935(87)90009-1.  
310
- 311 Gregory NG, Wotton SB (1989) Effect of electrical stunning on somatosensory  
312 evoked potentials in chickens. *British Veterinary Journal* **145**, 159–164.  
313 doi:10.1016/0007-1935(89)90098-5.  
314
- 315 Gregory NG, Wotton SB (1991) Effect of a 350 Hz DC stunning current on evoked  
316 responses in the chicken’s brain. *Research in veterinary science* **50**, 250–251.  
317 doi:10.1016/0034-5288(91)90118-8.  
318
- 319 Grimnes S, Martinsen ØG (2015) Chapter 1 - Introduction BT - Bioimpedance and  
320 Bioelectricity Basics (Third Edition). pp. 1–7. (Academic Press: Oxford)  
321 doi:http://dx.doi.org/10.1016/B978-0-12-411470-8.00001-5.  
322



- 323 Grimsbø E, Nortvedt R, Hammer E, Roth B (2014) Preventing injuries and recovery  
324 for electrically stunned Atlantic salmon (*Salmo salar*) using high frequency  
325 spectrum combined with a thermal shock. *Aquaculture* **434**, 277–281.  
326 doi:10.1016/j.aquaculture.2014.07.018.  
327
- 328 Huang JC, Huang M, Yang J, Wang P, Xu XL, Zhou GH (2014) The effects of  
329 electrical stunning methods on broiler meat quality: Effect on stress, glycolysis,  
330 water distribution, and myofibrillar ultrastructures. *Poultry Science* **93**, 2087–  
331 2095. doi:10.3382/ps.2013-03248.  
332
- 333 Manshour N, Maleki M, Kayikcioglu T (2018) Power spectrum analysis of EEG for  
334 watching 2D & 3D videos and resting state. In '2018 26th Signal Process.  
335 Commun. Appl. Conf.', 1–4. (IEEE) doi:10.1109/SIU.2018.8404394.  
336
- 337 Marchant BP (2003) Time–frequency Analysis for Biosystems Engineering.  
338 *Biosystems Engineering* **85**, 261–281. doi:10.1016/S1537-5110(03)00063-1.  
339
- 340 Martin JE, Christensen K, Vizzier-Thaxton Y, McKeegan DEF (2016) Effects of light  
341 on responses to low atmospheric pressure stunning in broilers. *British Poultry*  
342 *Science* 1–16. doi:10.1080/00071668.2016.1201200.  
343
- 344 OIE (2019) 'Terrestrial Animal Health Code 2019. Volume 1 : General provisions.' (©  
345 OIE (World Organisation for Animal Health)) [https://www.oie.int/standard-](https://www.oie.int/standard-setting/terrestrial-code/)  
346 [setting/terrestrial-code/](https://www.oie.int/standard-setting/terrestrial-code/).  
347
- 348 Prinz S, Van Oijen G, Ehinger F, Bessei W, Coenen a (2010) Effects of waterbath  
349 stunning on the electroencephalograms and physical reflexes of broilers using a  
350 pulsed direct current. *Poultry Science* **89**, 1275–1284. doi:10.3382/ps.2009-  
351 00136.  
352
- 353 Prinz S, Van Oijen G, Ehinger F, Bessei W, Coenen a. (2012) Electrical waterbath  
354 stunning: Influence of different waveform and voltage settings on the induction of  
355 unconsciousness and death in male and female broiler chickens. *Poultry*  
356 *Science* **91**, 998–1008. doi:10.3382/ps.2009-00137.  
357
- 358 Prinz S, Van Oijen G, Ehinger F, Coenen A, Bessei W (2010)  
359 Electroencephalograms and physical reflexes of broilers after electrical  
360 waterbath stunning using an alternating current. *Poultry Science* **89**, 1265–1274.  
361 doi:10.3382/ps.2009-00135.  
362
- 363 Raj a BM (2003) A critical appraisal of electrical stunning in chickens. *World's*  
364 *Poultry Science Journal* **59**, 89–98. doi:10.1079/WPS20030005.  
365
- 366 Raj ABM, O'Callaghan M (2004a) Effect of amount and frequency of head-only  
367 stunning currents on the electroencephalogram and somatosensory evoked  
368 potentials in broilers. *Animal Welfare* **13**, 159–170.  
369
- 370 Raj a BM, O'Callaghan M (2004b) Effects of electrical water bath stunning current  
371 frequencies on the spontaneous electroencephalogram and somatosensory

- 372 evoked potentials in hens. *British poultry science* **45**, 230–236.  
373 doi:10.1080/00071660410001715830.  
374
- 375 Raj ABM, O’Callaghan M, Knowles TG (2006a) The effects of amount and frequency  
376 of alternating current used in water bath stunning and of slaughter methods on  
377 electroencephalograms in broilers. *Animal Welfare* **15**, 19–24.  
378
- 379 Raj ABM, O’Callaghan M, Knowles TG (2006b) The effects of pulse width of a direct  
380 current used in water bath stunning and of slaughter methods on spontaneous  
381 electroencephalograms in broilers. *Animal Welfare* **15**, 25–30.  
382
- 383 Robins a., Pleiter H, Latter M, Phillips CJC (2014) The efficacy of pulsed ultrahigh  
384 current for the stunning of cattle prior to slaughter. *Meat Science* **96**, 1201–1209.  
385 doi:10.1016/j.meatsci.2013.10.030.  
386
- 387 De Sousa Silva AC, Céspedes Arce AI, Souto S, Xavier Costa EJ (2005) A wireless  
388 floating base sensor network for physiological responses of livestock. *Computers  
389 and Electronics in Agriculture* **49**,. doi:10.1016/j.compag.2005.05.004.  
390
- 391 Terlouw C, Bourguet C, Deiss V (2015) Consciousness, unconsciousness and death  
392 in the context of slaughter. Part II. Evaluation methods. *Meat Science*.  
393 doi:10.1016/j.meatsci.2016.03.010.  
394
- 395 Turcsán Z, Varga L, Szigeti J, Turcsán J, Csurák I, Szalai M (2003) Effects of  
396 electrical stunning frequency and voltage combinations on the presence of  
397 engorged blood vessels in goose liver. *Poultry science* **82**, 1816–1819.  
398
- 399 Wilkins LJ, Gregory NG, Wotton SB, Parkman ID (1998) Effectiveness of electrical  
400 stunning applied using a variety of waveform-frequency combinations and  
401 consequences for carcass quality in broiler chickens. *British poultry science* **39**,  
402 511–518. doi:10.1080/00071669888692.  
403
- 404 Xu L, Zhang L, Yue HY, Wu SG, Zhang HJ, Ji F, Qi GH (2011) Effect of electrical  
405 stunning current and frequency on meat quality, plasma parameters, and  
406 glycolytic potential in broilers. *Poultry science* **90**, 1823–1830.  
407 doi:10.3382/ps.2010-01249.  
408
- 409 Zivotofsky AZ, Strous RD (2012) A perspective on the electrical stunning of animals:  
410 Are there lessons to be learned from human electro-convulsive therapy (ECT)?  
411 *Meat Science* **90**, 956–961. doi:10.1016/j.meatsci.2011.11.039.  
412
